# Supplementary material for: Effective control of the carbon release of starch/polyvinyl alcohol based on a polyamide coating in solid-phase denitrification
Source: Royal Society of Chemistry journal article supplement (doi:10.1039/d0ew00721h), 2020-01-01
Supplement: d0ew00721h2.pdf [file d0ew00721h2.pdf]

**Table S1** The operating conditions and denitrification performance of reactor I and reactor II under different operation stages.

| Time (days)       | Phase   | NO <sub>3</sub> <sup>-</sup> -N<br>(mg/L) | NO <sub>2</sub> <sup>-</sup> -N<br>(mg/L) | NH <sub>4</sub> <sup>+</sup> -N<br>(mg/L) | TN (mg/L)  | COD<br>(mg/L) | NRR (%)     | DR<br>(gN/(L·d)) |
|-------------------|---------|-------------------------------------------|-------------------------------------------|-------------------------------------------|------------|---------------|-------------|------------------|
| <b>Reactor I</b>  |         |                                           |                                           |                                           |            |               |             |                  |
| <b>I</b>          |         |                                           |                                           |                                           |            |               |             |                  |
| 1-30              | Startup | 1.32±1.32                                 | 0.026±0.026                               | 0.98±0.27                                 | 2.21±1.45  | 308±60        | 95.68±2.81  | 0.062±0.010      |
| 31-40             | I       | 1.99±1.05                                 | 0.006±0.006                               | 1.88±0.99                                 | 3.44±0.71  | 192±24        | 93.25±1.47  | 0.092±0.003      |
| 41-50             | II      | 1.41±0.63                                 | 0.003±0.003                               | 1.33±0.16                                 | 2.64±0.63  | 124±8         | 94.77±1.24  | 0.140±0.003      |
| 51-60             | III     | 16.81±1.08                                | 3.081±2.035                               | 0.09±0.04                                 | 19.26±2.01 | 94±6          | 62.78±3.73  | 0.207±0.033      |
| 61-80             | IV      | 2.58±2.03                                 | 0.012±0.012                               | 0.06±0.04                                 | 2.60±2.03  | 59±5          | 94.93±3.93  | 0.092±0.006      |
| 81-90             | V       | 2.83±0.20                                 | 0.018±0.018                               | 0.04±0.01                                 | 2.88±0.18  | 52±2          | 94.30±0.34  | 0.130±0.011      |
| 91-100            | VI      | 29.74±9.28                                | 1.819±1.041                               | 0.04±0.01                                 | 32.20±9.19 | 37±1          | 36.44±18.94 | 0.108±0.057      |
| 101-120           | VII     | 2.26±0.77                                 | 0.113±0.113                               | 0.0225                                    | 2.41±0.68  | 55±5          | 95.24±1.38  | 0.129±0.014      |
| <b>Reactor II</b> |         |                                           |                                           |                                           |            |               |             |                  |
| <b>II</b>         |         |                                           |                                           |                                           |            |               |             |                  |
| 1-30              | Startup | 1.63±1.63                                 | 0.003±0.003                               | 0.63±0.31                                 | 2.10±1.79  | 158±14        | 95.89±3.49  | 0.059±0.014      |
| 31-40             | I       | 2.68±1.58                                 | 0.009±0.009                               | 1.19±0.59                                 | 3.78±1.10  | 82±6          | 92.68±2.11  | 0.092±0.002      |
| 41-50             | II      | 1.63±0.65                                 | 0.004±0.004                               | 0.90±0.12                                 | 2.56±0.67  | 70±6          | 94.94±1.32  | 0.140±0.003      |
| 51-60             | III     | 18.52±0.71                                | 3.687±1.934                               | 0.08±0.03                                 | 22.55±2.03 | 52±4          | 55.74±4.52  | 0.185±0.036      |
| 61-80             | IV      | 3.84±2.82                                 | 0.010±0.010                               | 0.05±0.03                                 | 2.86±2.82  | 30±10         | 92.49±5.47  | 0.091±0.006      |
| 81-90             | V       | 2.79±0.47                                 | 0.051±0.028                               | 0.04±0.01                                 | 2.87±0.45  | 16±0          | 94.40±0.80  | 0.129±0.012      |
| 91-100            | VI      | 29.95±6.78                                | 1.942±0.911                               | 0.04±0.01                                 | 31.57±6.55 | 14±2          | 38.51±12.97 | 0.114±0.040      |
| 101-120           | VII     | 2.36±0.91                                 | 0.114±0.111                               | 0.0225                                    | 2.39±0.91  | 22±2          | 95.33±1.71  | 0.128±0.015      |
