# Supplementary material for: Effective control of the carbon release of starch/polyvinyl alcohol based on a polyamide coating in solid-phase denitrification
Source: Royal Society of Chemistry journal article supplement (doi:10.1039/d0ew00721h), 2020-01-01
Supplement: d0ew00721h3.pdf [file d0ew00721h3.pdf]

## Effective control of the carbon releasing of starch/polyvinyl alcohol based on the polyamide coating in solid-phase denitrification

Wande Ding<sup>a,b,1,\*</sup>, Huan Liu<sup>a,1</sup>, Kefeng Zhang<sup>a</sup>, Dongxiao Lv<sup>a</sup>, Shan Wang<sup>a</sup>

<sup>a</sup> School of Municipal and Environmental Engineering, Shandong Jianzhu University, Jinan, 250101, China

<sup>b</sup> Shuifa Group CO., LTD., Jinan, 250000, China

<sup>1</sup> Wande Ding and Huan Liu are the first authors

\*Corresponding author: Wande Ding, E-mail address: [dingwande18@sdjzu.edu.cn](mailto:dingwande18@sdjzu.edu.cn);

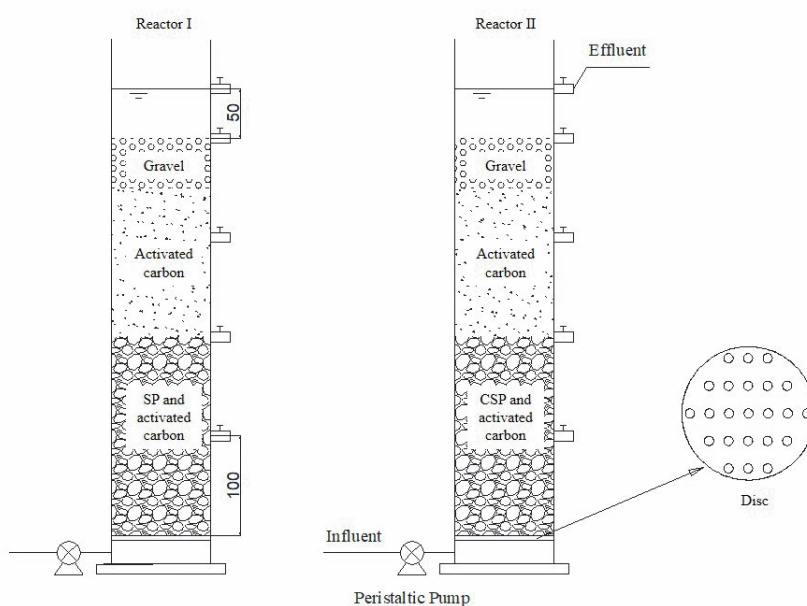

Fig. S1 Experimental set-up. (Reactor I, filled with SP carbon source; Reactor II, filled with CSP carbon source)

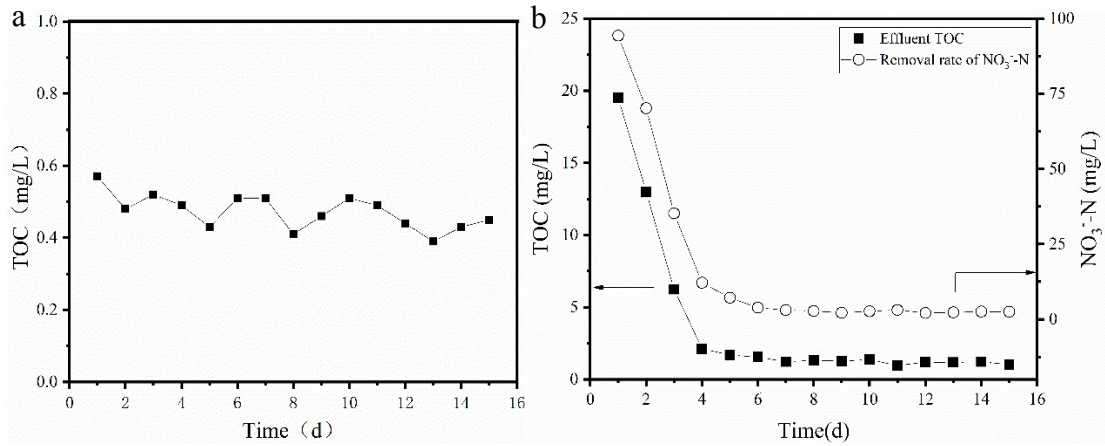

Fig. S2 Leaching performance of PVA (a) and denitrification performance of the batch test (b).

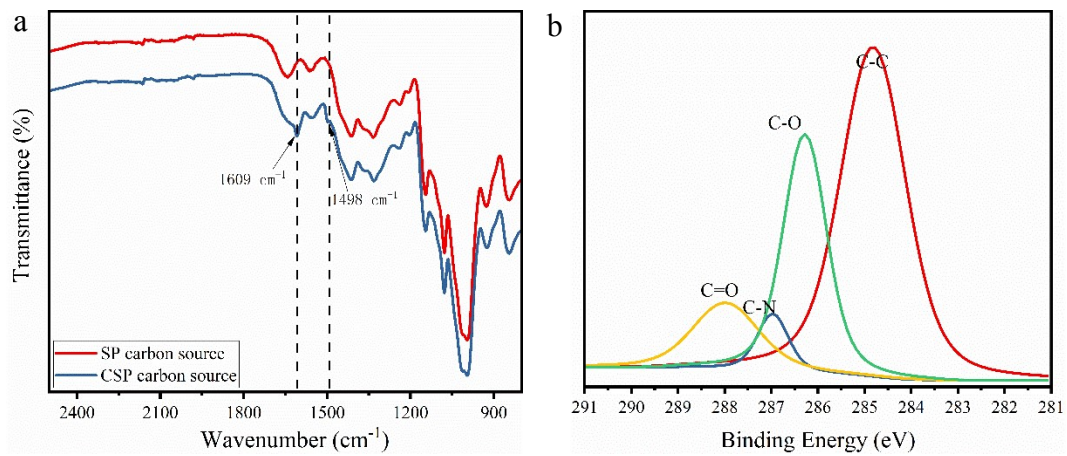

Fig. S3 (a) FTIR spectra of SP and CSP carbon source and (b) XPS spectra of CSP carbon source.

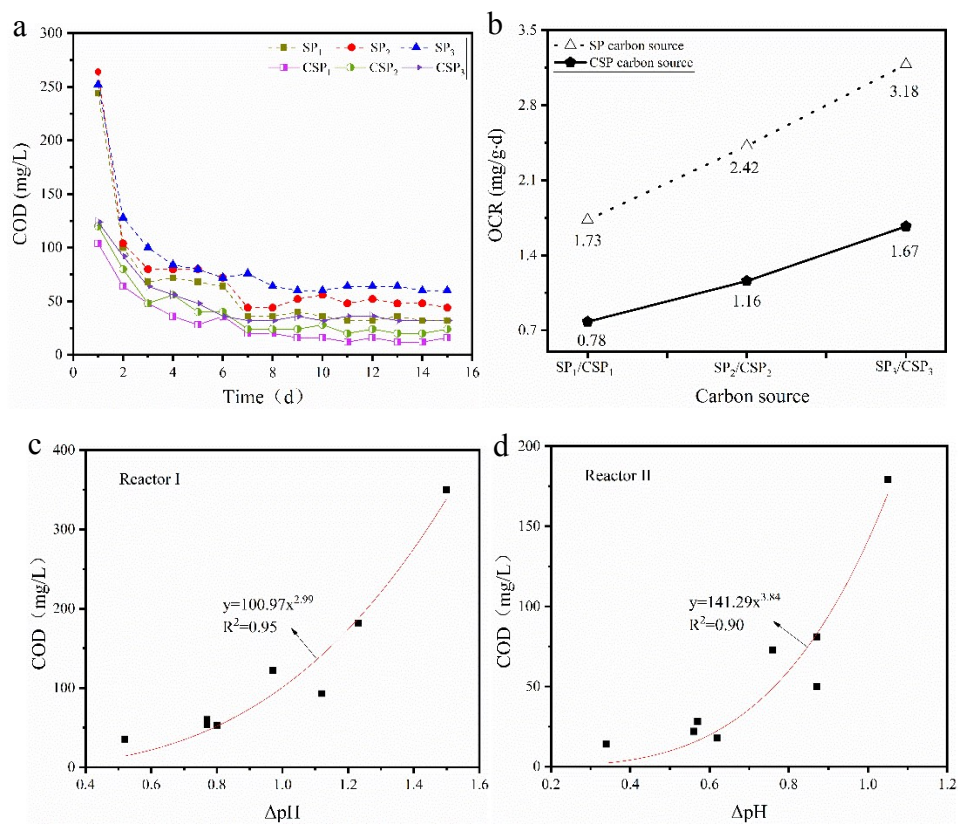

Fig. S4 COD releasing concentration (a) and rate (b) of the different carbon sources in leaching experiments; relationship between average effluent pH and average COD at different stages in continuous flow experiment (c)(d).

**Table S1** The operating conditions and denitrification performance of reactor I and reactor II under different operation stages.

| Time (days)       | Phase   | NO <sub>3</sub> <sup>-</sup> -N<br>(mg/L) | NO <sub>2</sub> <sup>-</sup> -N<br>(mg/L) | NH <sub>4</sub> <sup>+</sup> -N<br>(mg/L) | TN (mg/L)  | COD<br>(mg/L) | NRR (%)     | DR<br>(gN/(L·d)) |
|-------------------|---------|-------------------------------------------|-------------------------------------------|-------------------------------------------|------------|---------------|-------------|------------------|
| <b>Reactor I</b>  |         |                                           |                                           |                                           |            |               |             |                  |
| <b>I</b>          |         |                                           |                                           |                                           |            |               |             |                  |
| 1-30              | Startup | 1.32±1.32                                 | 0.026±0.026                               | 0.98±0.27                                 | 2.21±1.45  | 308±60        | 95.68±2.81  | 0.062±0.010      |
| 31-40             | I       | 1.99±1.05                                 | 0.006±0.006                               | 1.88±0.99                                 | 3.44±0.71  | 192±24        | 93.25±1.47  | 0.092±0.003      |
| 41-50             | II      | 1.41±0.63                                 | 0.003±0.003                               | 1.33±0.16                                 | 2.64±0.63  | 124±8         | 94.77±1.24  | 0.140±0.003      |
| 51-60             | III     | 16.81±1.08                                | 3.081±2.035                               | 0.09±0.04                                 | 19.26±2.01 | 94±6          | 62.78±3.73  | 0.207±0.033      |
| 61-80             | IV      | 2.58±2.03                                 | 0.012±0.012                               | 0.06±0.04                                 | 2.60±2.03  | 59±5          | 94.93±3.93  | 0.092±0.006      |
| 81-90             | V       | 2.83±0.20                                 | 0.018±0.018                               | 0.04±0.01                                 | 2.88±0.18  | 52±2          | 94.30±0.34  | 0.130±0.011      |
| 91-100            | VI      | 29.74±9.28                                | 1.819±1.041                               | 0.04±0.01                                 | 32.20±9.19 | 37±1          | 36.44±18.94 | 0.108±0.057      |
| 101-120           | VII     | 2.26±0.77                                 | 0.113±0.113                               | 0.0225                                    | 2.41±0.68  | 55±5          | 95.24±1.38  | 0.129±0.014      |
| <b>Reactor II</b> |         |                                           |                                           |                                           |            |               |             |                  |
| <b>II</b>         |         |                                           |                                           |                                           |            |               |             |                  |
| 1-30              | Startup | 1.63±1.63                                 | 0.003±0.003                               | 0.63±0.31                                 | 2.10±1.79  | 158±14        | 95.89±3.49  | 0.059±0.014      |
| 31-40             | I       | 2.68±1.58                                 | 0.009±0.009                               | 1.19±0.59                                 | 3.78±1.10  | 82±6          | 92.68±2.11  | 0.092±0.002      |
| 41-50             | II      | 1.63±0.65                                 | 0.004±0.04                                | 0.90±0.12                                 | 2.56±0.67  | 70±6          | 94.94±1.32  | 0.140±0.003      |
| 51-60             | III     | 18.52±0.71                                | 3.687±1.934                               | 0.08±0.03                                 | 22.55±2.03 | 52±4          | 55.74±4.52  | 0.185±0.036      |
| 61-80             | IV      | 3.84±2.82                                 | 0.010±0.010                               | 0.05±0.03                                 | 2.86±2.82  | 30±10         | 92.49±5.47  | 0.091±0.006      |
| 81-90             | V       | 2.79±0.47                                 | 0.051±0.028                               | 0.04±0.01                                 | 2.87±0.45  | 16±0          | 94.40±0.80  | 0.129±0.012      |
| 91-100            | VI      | 29.95±6.78                                | 1.942±0.911                               | 0.04±0.01                                 | 31.57±6.55 | 14±2          | 38.51±12.97 | 0.114±0.040      |
| 101-120           | VII     | 2.36±0.91                                 | 0.114±0.111                               | 0.0225                                    | 2.39±0.91  | 22±2          | 95.33±1.71  | 0.128±0.015      |
