# Supplementary figures and images for: Effective control of the carbon release of starch/polyvinyl alcohol based on a polyamide coating in solid-phase denitrification
Source: Royal Society of Chemistry journal article supplement (doi:10.1039/d0ew00721h), 2020-01-01

Fig.S1

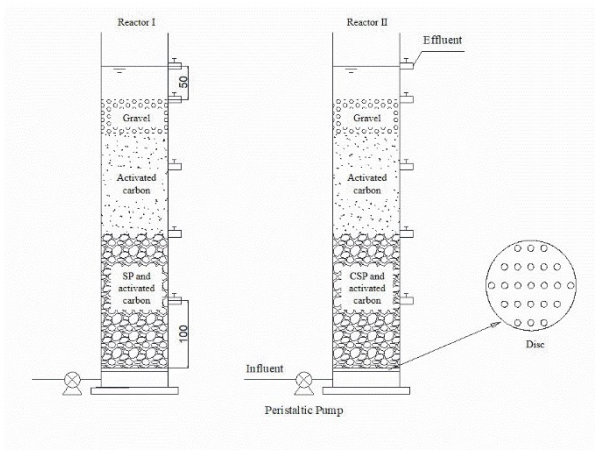

Fig.S2a

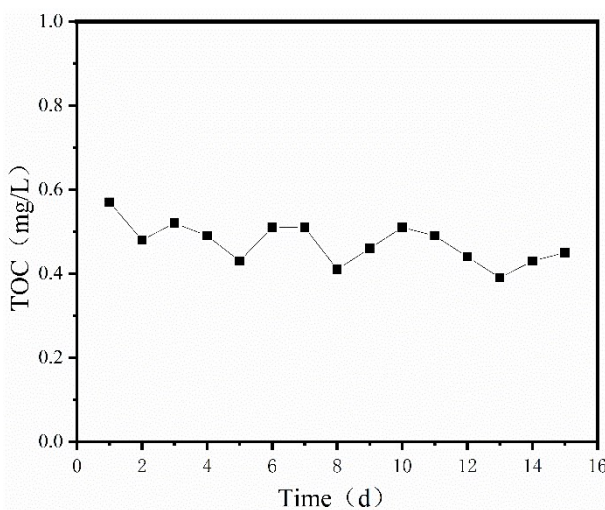

Fig.S2b

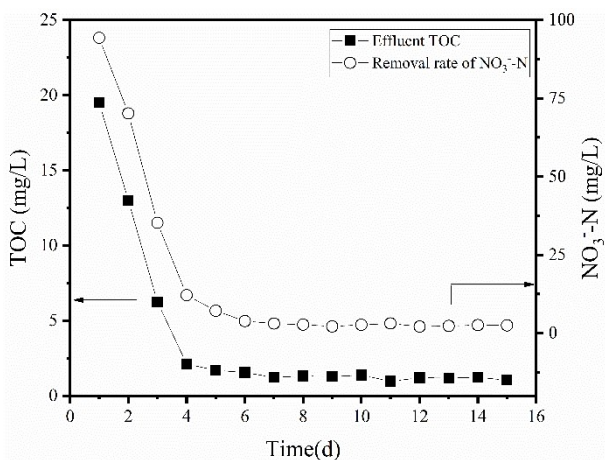

Fig.S3a

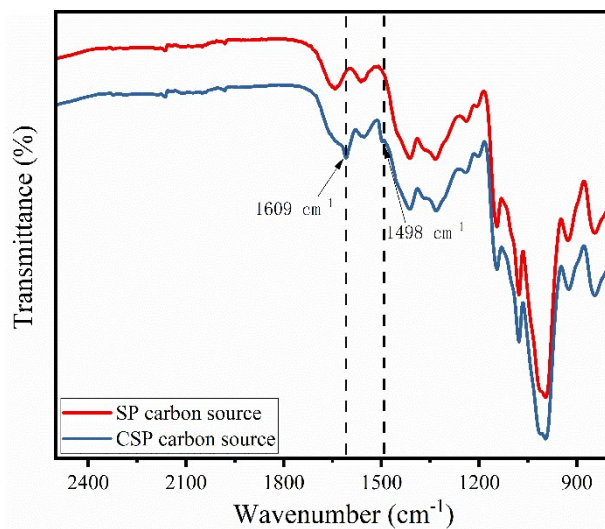

Fig.S3b

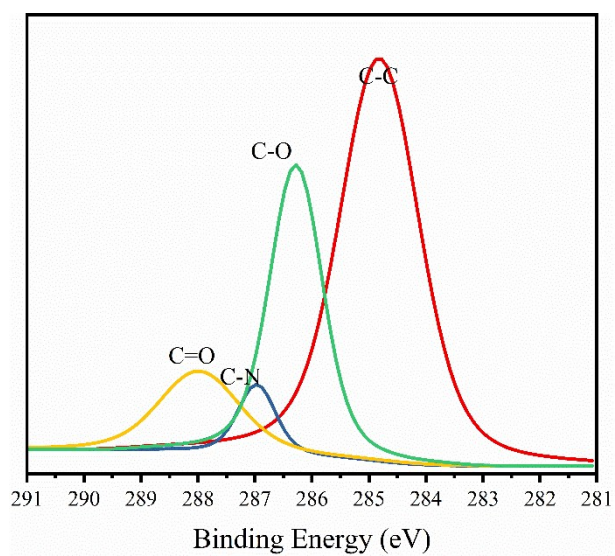

Fig.S4a

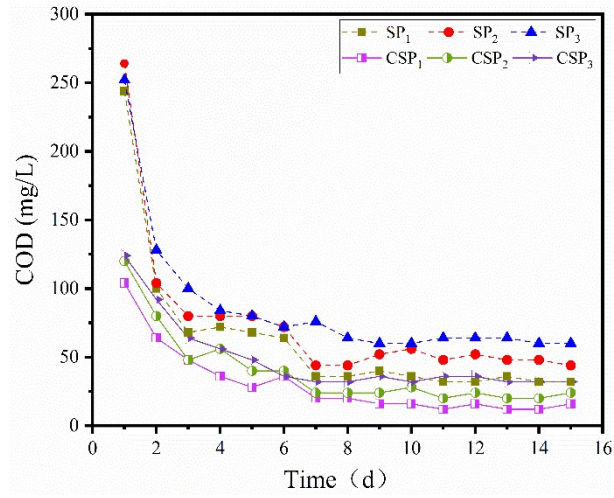

Fig.S4b

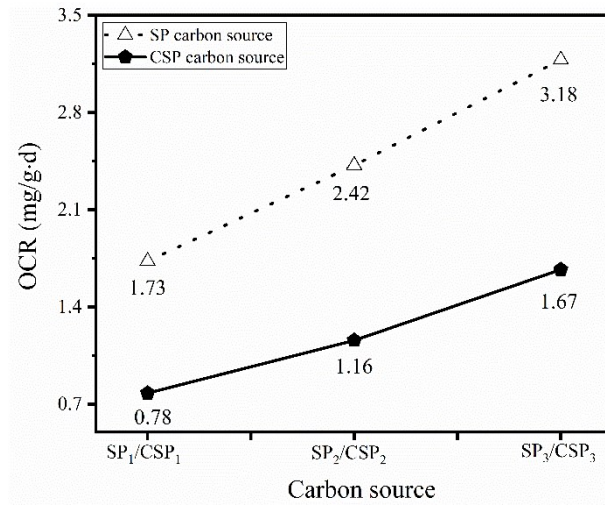

Fig.S4c

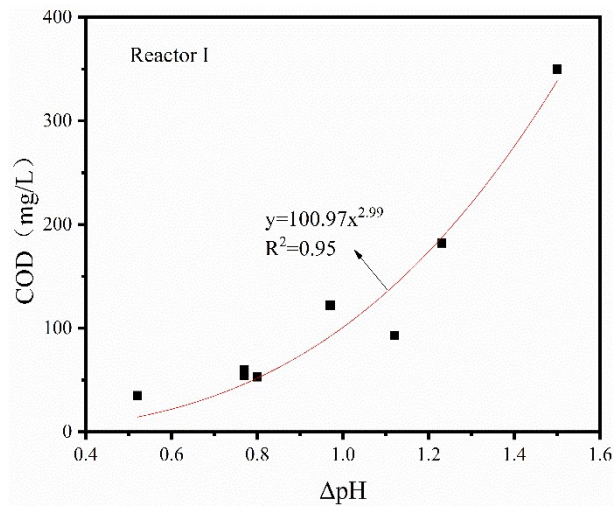

Fig.S4d

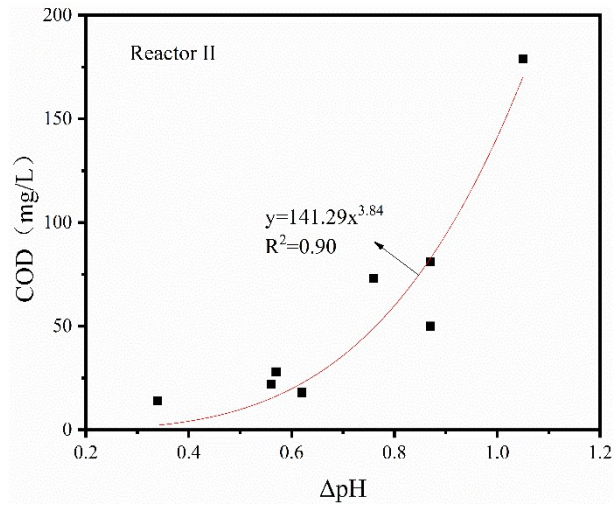

Supplement: d0ew00721h1.pdf [file d0ew00721h1.pdf]
